# Supplementary material
Source: PubMed Central journal article supplement (PMC3423867)
Supplement: Supp_Data.pdf [file Supp_Data.pdf]

# Supplementary Data

## Supplementary Methods

### *Migration assay*

Bovine aortic endothelial cells (BAECs) or human aortic endothelial cells (HAECs) were grown to 80% confluency and quiesced overnight. Scratch wounds were applied to endothelial cell (EC) monolayers in low-serum media as previously described (11, 20). Inhibitors were given 1 h before making a scratch wound with a pipette tip and reapplied at the time of the scratch. The vascular endothelial growth factor (VEGF; 50 ng/ml) or diethylenetriamine NONOate (DETA NONOate) (30  $\mu$ M, released concentration  $\approx$  1  $\mu$ M) (32) was given at the time of the scratch in a serum-free medium. Images were taken at 0 and 6 h at three fixed locations along the scratch (Fig. S1). Migration distances were averaged from the three measurements per condition using ImageJ software, and this was considered as  $n=1$ . Briefly, images were analyzed with ImageJ software (NIH) by measuring the average distance of migration for each cell bordering the scratch in a given field of view. The  $x$  and  $y$  locations of the center of each cell were taken using thresholded images and the center of the mass ImageJ function at both 0 and 6 h. Cell locations for each timepoint were averaged. The migration distance was calculated as (avg location at 6 h - avg. location at 0 h)/2.

### *Intracellular Ca<sup>2+</sup> imaging*

HAECs plated on gelatin-coated glass coverslips were loaded with 2  $\mu$ M Fura2-AM (Invitrogen) in the presence of

0.02% pluronic F127 (Invitrogen) in serum-free endothelial growth media, and right before the experiment were transferred to nominally Ca<sup>2+</sup>-free physiological saline solution (PSS) supplemented with 2.5 mM probenecid (Alfa Aesar, Ward Hill, MA). Changes in intracellular Ca<sup>2+</sup> ( $F_{340}/F_{380}$ ) were monitored as previously described (4, 19). Briefly, cells were allowed to equilibrate in nominally Ca<sup>2+</sup>-free PSS for 1 min before addition of VEGF, •NO, or thapsigargin (TG). After 2.5 min, Ca<sup>2+</sup> (2 mM) was added to the PSS. Ca<sup>2+</sup> influx was recorded for 2 min before addition of ionomycin (2  $\mu$ M) to permeabilize the membrane and manganese (8 mM) to quench the Fura2. A dual-excitation fluorescence imaging system (Intracellular Imaging, Cincinnati, OH) was used for studies of individual cells (see Supplementary Methods for expanded details). The system was calibrated using Ca<sup>2+</sup> solutions of known concentration ( $R_{\max}=7.595$  at 1.35  $\mu$ M Ca<sup>2+</sup> and  $R_{\min}=0.193$  at 0 nM Ca<sup>2+</sup>), and background was subtracted from each defined region of interest. The changes in intracellular Ca<sup>2+</sup> were recorded in each individual cell, and expressed as  $\Delta$ Ratio, which was calculated for each cell as the difference between the maximal  $F_{340}/F_{380}$  ratio after extracellular Ca<sup>2+</sup> was added, and its level right before Ca<sup>2+</sup> addition. Representative traces show average  $\pm$  standard error of the mean (SEM) of Ca<sup>2+</sup> responses from 15 to 50 cells on the same coverslip recorded simultaneously. Summary data represent the mean  $\pm$  SEM of  $\Delta$ Ratio from at least three cell preparations, with three to five coverslips studied for each condition.

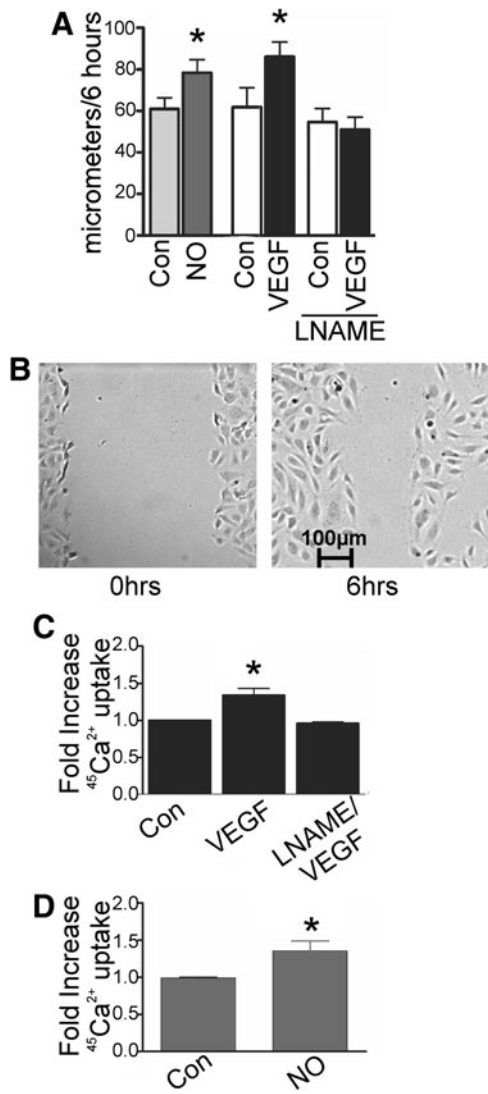

**SUPPLEMENTARY FIG. S1. VEGF and \*NO increase endothelial cell migration and SERCA activity in BAEC.** (A) BAEC monolayers were treated with VEGF (50 ng/ml) or DETA NONOate (30 µM), and then migration into a scratch wound was measured over 6 h. The \*NO synthase inhibitor, LNAME (30 µM), was added just before the scratch (*n*=3). (B) Representative migration images at 0 and 6 h. (C, D) SERCA activity was assessed by TG-sensitive <sup>45</sup>Ca<sup>2+</sup> uptake in saponin-permeabilized HAECs treated with VEGF or VEGF with LNAME (C), or DETA NONOate [(D), *n*=4]. \**p*<0.05. BAEC, bovine aortic endothelial cell; DETA NONOate, diethylenetriamine NONOate; HAEC, human aortic endothelial cell; LNAME, N (G)-nitro-L-arginine methyl ester; \*NO, nitric oxide; SERCA, sarco/endoplasmic reticulum Ca<sup>2+</sup> ATPase; TG, thapsigargin; VEGF, vascular endothelial growth factor.

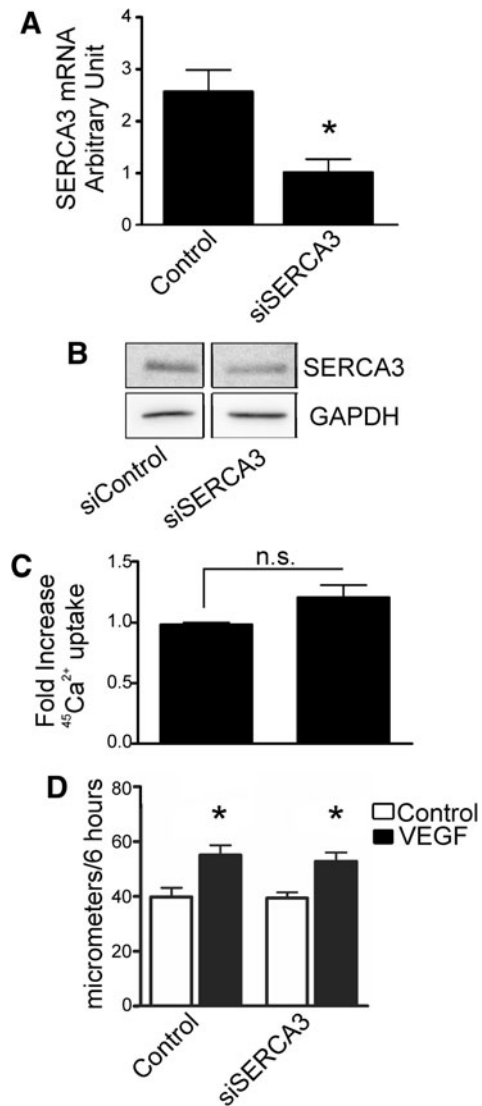

**SUPPLEMENTARY FIG. S2. Knockdown of SERCA3 does not inhibit VEGF-induced EC migration.** Knockdown of low levels of SERCA3 mRNA was confirmed by qRT-PCR (A) and immunoblot [(B), *n*=4]. (C) <sup>45</sup>Ca<sup>2+</sup> uptake into saponin-permeabilized HAECs (*n*=3). (D) Migration over 6 h was assessed after treatment with SERCA3 siRNA (*n*=6, \**p*<0.05). EC, endothelial cell.

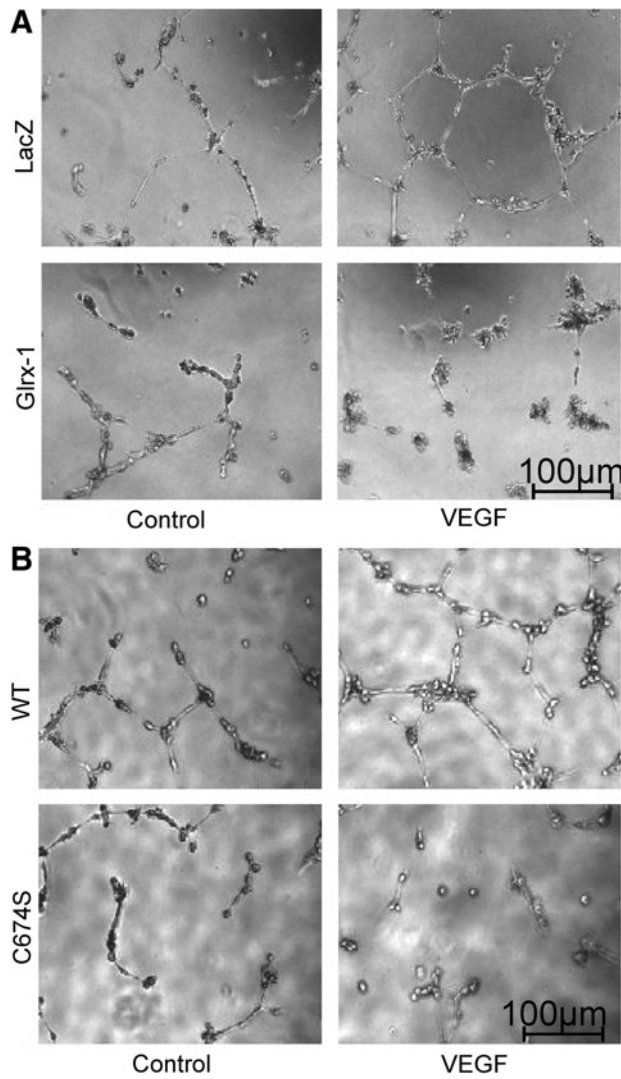

**SUPPLEMENTARY FIG. S3. Representative images of HAEC tube formation.** (A) Tube formation in response to VEGF treatment in HAECs overexpressing either LacZ or Glrx-1. (B) VEGF-induced tube formation in HAECs overexpressing either WT SERCA2b or SERCA2b C674S. WT, wild type.

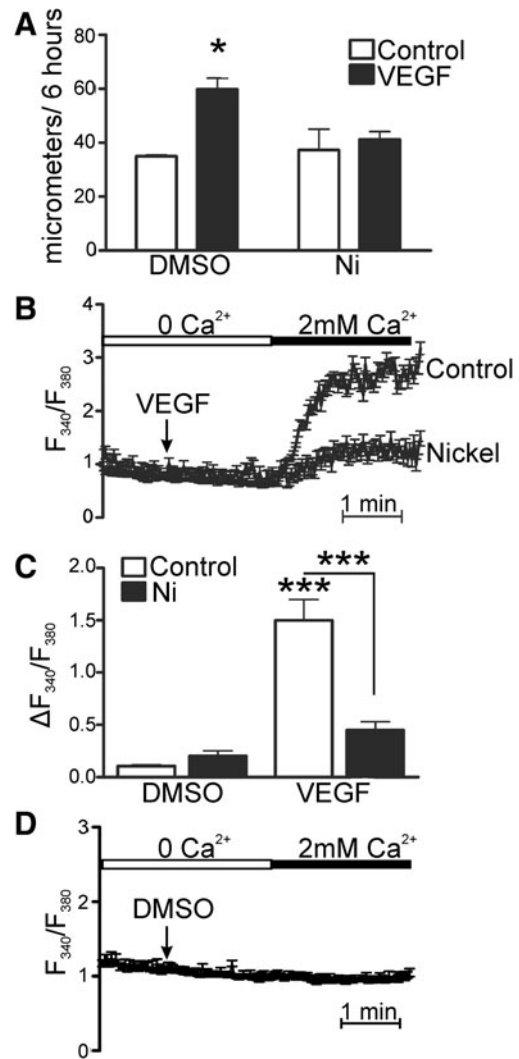

**SUPPLEMENTARY FIG. S4. Nickel inhibits both EC migration and Ca<sup>2+</sup> influx.** (A) Migration of HAECs treated with or without nickel (100 µM) over 6 h ( $n=3$ ). (B, C) VEGF-induced EC Ca<sup>2+</sup> influx in the presence or absence of nickel [(B), representative trace] and [(C),  $n=3$ ]. \* $p<0.05$  and \*\*\* $p<0.001$ . (D) Representative trace of HAECs treated with DMSO vehicle for VEGF before addition of Ca<sup>2+</sup>. DMSO, dimethyl sulfoxide.
